# Supplementary material for: Unveiling Distinct Proteomic Signatures in Complicated Crohn’s Disease That Could Predict the Disease Course
Source: MDPI journal article supplement (doi:10.3390/ijms242316966), 2023-11-30
Supplement: s1 [file s1]

Supplementary Table S2. Overview on the VIP scores PLS-DA, t-test and foldchanges of the 24 significantly different proteins among the CD and HC groups

| No. | Protein name                                       | UniProtID  | Gene     | VIPScore PLS-DA |         |         | t-Test  |          |           | Fold change |             |          |
|-----|----------------------------------------------------|------------|----------|-----------------|---------|---------|---------|----------|-----------|-------------|-------------|----------|
|     |                                                    |            |          | Comp. 1         | Comp. 2 | Comp. 3 | t.stat  | p.value  | -log10(p) | FDR         | CD vs HC    | HC vs CD |
| 1   | Complement factor H-related protein 5              | Q9BXR6     | CFHR5    | 5.00            | 4.16    | 3.73    | 4.3421  | 8.52E-05 | 4.0697    | 0.006482    | <b>9.95</b> | 0.10     |
| 2   | WD repeat-containing protein 31                    | Q8NA23     | WDR31    | 6.84            | 5.74    | 5.08    | 4.7565  | 3.47E-05 | 4.4602    | 0.002931    | <b>8.78</b> | 0.11     |
| 3   | Haptoglobin                                        | P00738     | HP       | 4.73            | 3.92    | 3.57    | 5.1244  | 8.80E-06 | 5.0553    | 0.002931    | <b>7.84</b> | 0.13     |
| 4   | Serum amyloid A-1 protein                          | P0DJ18     | SAA1     | 2.46            | 2.06    | 2.00    | 3.8795  | 0.000433 | 3.3631    | 0.020613    | <b>3.36</b> | 0.30     |
| 5   | Putative glycine N-acyltransferase-like protein 1B | A0A0U1RQE8 | GLYATL1B | 2.61            | 2.17    | 2.06    | 4.7764  | 3.37E-05 | 4.4726    | 0.002931    | <b>3.14</b> | 0.32     |
| 6   | C-reactive protein                                 | P02741     | CRP      | 2.49            | 2.06    | 1.91    | 4.1453  | 0.000175 | 3.7574    | 0.010234    | <b>2.86</b> | 0.35     |
| 7   | Haptoglobin-related protein                        | P00739     | HPR      | 2.56            | 2.14    | 2.09    | 4.7391  | 2.39E-05 | 4.6210    | 0.002931    | <b>2.56</b> | 0.39     |
| 8   | GDH/6PGL endoplasmic bifunctional protein          | O95479     | H6PD     | 2.20            | 1.88    | 1.65    | 4.3812  | 0.000116 | 3.9340    | 0.007556    | <b>1.97</b> | 0.51     |
| 9   | Leucine-rich alpha-2-glycoprotein                  | P02750     | LRG1     | 1.91            | 1.64    | 1.46    | 4.7436  | 2.39E-05 | 4.6222    | 0.002931    | <b>1.89</b> | 0.53     |
| 10  | Zinc finger protein 484                            | Q5JVG2     | ZNF484   | 2.02            | 1.70    | 1.56    | 3.6403  | 0.000955 | 3.0199    | 0.030288    | <b>1.89</b> | 0.53     |
| 11  | Translationally-controlled tumor protein           | P13693     | TPT1     | 1.83            | 1.62    | 1.43    | 3.9518  | 0.000399 | 3.3993    | 0.020228    | <b>1.76</b> | 0.57     |
| 12  | Rho guanine nucleotide exchange factor 9           | O43307     | ARHGEF9  | 1.61            | 1.43    | 1.29    | 4.2335  | 0.000119 | 3.9239    | 0.007556    | <b>1.73</b> | 0.58     |
| 13  | Putative inactive neutral ceramidase B             | P0C7U1     | ASAH2B   | 1.46            | 1.21    | 1.07    | 3.6373  | 0.000791 | 3.1017    | 0.026180    | <b>1.61</b> | 0.62     |
| 14  | Serine/threonine-protein kinase                    | O95747     | OXSR1    | 1.71            | 1.56    | 1.38    | 3.8332  | 0.000774 | 3.1111    | 0.026180    | <b>1.61</b> | 0.62     |
| 15  | Alpha-1-antichymotrypsin                           | P01011     | SERPINA3 | 1.36            | 1.14    | 1.02    | 4.6826  | 2.84E-05 | 4.5464    | 0.002931    | <b>1.56</b> | 0.64     |
| 16  | Complement component C9                            | P02748     | C9       | 1.24            | 1.05    | 0.94    | 4.693   | 2.80E-05 | 4.5535    | 0.002931    | <b>1.50</b> | 0.67     |
| 17  | Immunoglobulin kappa constant                      | P01834     | IGKC     | 1.13            | 0.96    | 0.91    | 3.6639  | 0.000681 | 3.1670    | 0.026180    | 1.48        | 0.68     |
| 18  | Microtubule-associated protein 1A                  | P78559     | MAP1A    | 1.22            | 1.14    | 1.01    | 5.0487  | 9.23E-06 | 5.0346    | 0.002931    | 1.46        | 0.69     |
| 19  | DNA polymerase epsilon catalytic subunit A         | Q07864     | POLE     | 1.06            | 0.93    | 0.83    | 4.7148  | 2.56E-05 | 4.5916    | 0.002931    | 1.40        | 0.72     |
| 20  | Girdin                                             | Q3V6T2     | CCDC88A  | 0.98            | 0.82    | 0.75    | 3.6491  | 0.00071  | 3.1485    | 0.026180    | 1.38        | 0.73     |
| 21  | PTB domain-containing engulfment adapter protein 1 | Q9UBP9     | GULP1    | 1.07            | 0.89    | 0.80    | 3.6921  | 0.000767 | 3.1154    | 0.026180    | 1.38        | 0.73     |
| 22  | Complement factor B                                | P00751     | CFB      | 1.04            | 0.97    | 0.85    | 3.9297  | 0.000373 | 3.4282    | 0.020228    | 1.37        | 0.73     |
| 23  | Coagulation factor IX                              | P00740     | F9       | 0.78            | 0.65    | 0.68    | 3.6488  | 0.000708 | 3.1498    | 0.026180    | 1.29        | 0.78     |
| 24  | Envoplakin                                         | Q92817     | EVPL     | 1.27            | 1.27    | 1.25    | -3.7873 | 0.000534 | 3.2723    | 0.023912    | 0.72        | 1.39     |
