# Supplementary material for: Unveiling Distinct Proteomic Signatures in Complicated Crohn’s Disease That Could Predict the Disease Course
Source: MDPI journal article supplement (doi:10.3390/ijms242316966), 2023-11-30
Supplement: s1 [file s1]

Supplementary methods. LC-MS<sup>E</sup> and search parameters

*Description of experiment settings for LC-MS<sup>E</sup> analysis and identification of proteins*

|                                                                                      |                                                           |
|--------------------------------------------------------------------------------------|-----------------------------------------------------------|
| <b>LC-Parameters</b>                                                                 |                                                           |
| LC gradient<br>A: 0.1 % formic acid in water<br>B: 0.1 % formic acid in acetonitrile | 0min-5% B-5m-5%-95m-40%-100m-85%-105m-85%-106m-5%-120m-5% |
| Flow rate                                                                            | 0.300μL/min                                               |
| Column temperature                                                                   | 55°C                                                      |
| <b>MS<sup>E</sup>-Parameters</b>                                                     |                                                           |
| Lock spray                                                                           | GluFib precursor 785.8426 m/z                             |
| Acquisition times                                                                    | 10-110min                                                 |
| Acquisition mode                                                                     | positive, resolution                                      |
| Mass range                                                                           | 50-2000Da                                                 |
| Capillary voltage                                                                    | 3kV                                                       |
| Sampling cone                                                                        | 40V                                                       |
| Source offset                                                                        | 80V                                                       |
| Source temperature                                                                   | 80°C                                                      |
| Nebuliser gas flow                                                                   | 6.5 bar                                                   |
| Trap collision energy                                                                | 4V                                                        |
| Transfer collision energy                                                            | 2V                                                        |

| Protein search parameter                                                   | Settings                                                                          |
|----------------------------------------------------------------------------|-----------------------------------------------------------------------------------|
| Name of peak list-generating software and release version (number or date) | Progenesis QI v3.0 (Waters Corporation)                                           |
| Name of the search engine and release version (number or date)             | MS <sup>E</sup> built in search engine of Progenesis QI v2.0 (Waters Corporation) |
| Name of database searched and release version/date                         | Swissprot database release 2022/03 limited to human entries                       |
| Enzyme specificity considered                                              | Fully tryptic                                                                     |
| # of missed cleavages permitted                                            | 1                                                                                 |
| Fixed modification(s) (including residue specificity)                      | carbamidomethylation of cysteine                                                  |
| Variable modification(s) (including residue specificity)                   | oxidation of methionine                                                           |
| Fragment ions per protein                                                  | 5                                                                                 |
| Fragment ions per peptide                                                  | 2                                                                                 |
| Threshold score for accepting protein identification                       | ≥1 significant peptides                                                           |
| Threshold score/E-value for accepting <i>individual</i> MS/MS Spectra      | False discovery rate at peptide level <4%                                         |
| software/method used to evaluate site assignment                           | No PTM reported                                                                   |

#### Presentation of Protein Identification Results

| Information requested                                                         | Reported                                                                       |
|-------------------------------------------------------------------------------|--------------------------------------------------------------------------------|
| Accession number                                                              | UniProtID number and Protein name                                              |
| Number of <i>unique</i> (in terms of amino acid sequence) peptides identified | Only <i>non-conflicting</i> peptides have been considered (Progenesis QI v3.0) |
