# Supplementary material for: Unveiling Distinct Proteomic Signatures in Complicated Crohn’s Disease That Could Predict the Disease Course
Source: MDPI journal article supplement (doi:10.3390/ijms242316966), 2023-11-30
Supplement: s1 [file s1]

Supplementary Table S3. Overview on the VIP scores PLS-DA, ANOVA and foldchanges of the 29 significantly different proteins among the groups

| No. | Protein name                                                                    | UniProtID | Gene     | VIPScore PLS-DA |         |         |         | Tukey's HSD |          |                  |       | Fold change |         |            |              |                |      |
|-----|---------------------------------------------------------------------------------|-----------|----------|-----------------|---------|---------|---------|-------------|----------|------------------|-------|-------------|---------|------------|--------------|----------------|------|
|     |                                                                                 |           |          | Comp. 1         | Comp. 2 | Comp. 3 | f.value | p.value     | FDR      | Tukey's HSD      | HC-B1 | HC-B2B3     | B1-B2B3 | FC(B1vsHC) | FC(B2B3vsB1) | FC(B2B3 vs HC) |      |
| 1   | Albumin                                                                         | P02768    | ALB      | 1.62            | 2.57    | 2.34    | 8.4211  | 0.000841    | 0.031999 | B2B3-B1; HC-B2B3 | x     | x           | x       | 0.7        | 3.5          | 0.3            | 0.90 |
| 2   | Alpha-1-antichymotrypsin                                                        | P01011    | SERPINA3 | 1.09            | 0.84    | 0.75    | 9.4252  | 0.000416    | 0.029702 | B2B3-B1; HC-B2B3 | x     | x           | x       | 1.3        | 0.8          | 1.3            | 1.04 |
| 3   | Charged multivesicular body protein 3                                           | Q9Y3E7    | CHMP3    | 2.12            | 2.21    | 1.98    | 8.4396  | 0.00083     | 0.031999 | B2B3-B1; HC-B2B3 | x     | x           | x       | 0.6        | 2.6          | 0.4            | 0.88 |
| 4   | Complement component C9                                                         | P02748    | C9       | 1.19            | 0.9     | 0.8     | 8.1334  | 0.001034    | 0.034202 | HC-B2B3          | x     | x           | x       | 1.4        | 0.9          | 1.1            | 1.04 |
| 5   | Complement factor I                                                             | P05156    | CFI      | 0.51            | 0.4     | 0.35    | 7.5318  | 0.001602    | 0.040241 | HC-B2B3          | x     | x           | x       | 1.1        | 0.8          | 1.2            | 1.02 |
| 6   | DNA polymerase epsilon catalytic subunit A                                      | Q07864    | POLE     | 0.9             | 0.67    | 0.61    | 9.1396  | 0.000507    | 0.029702 | B2B3-B1; HC-B2B3 | x     | x           | x       | 1.3        | 0.8          | 1.2            | 1.04 |
| 7   | Dynein axonemal heavy chain 7                                                   | Q8WXX0    | DNAH7    | 1.31            | 1.97    | 1.9     | 7.8533  | 0.001266    | 0.035687 | HC-B1; HC-B2B3   | x     | x           | x       | 0.7        | 2.7          | 0.4            | 0.90 |
| 8   | Epididymal secretory glutathione peroxidase                                     | Q75715    | GPX5     | 2.47            | 3.02    | 2.76    | 10.998  | 0.000144    | 0.026227 | HC-B1; HC-B2B3   | x     | x           | x       | 0.6        | 5.1          | 0.2            | 0.75 |
| 9   | GDIH/6PGL endoplasmic bifunctional protein                                      | O95479    | H6PD     | 1.88            | 1.44    | 1.28    | 11.397  | 0.000111    | 0.026227 | B2B3-B1; HC-B2B3 | x     | x           | x       | 1.6        | 0.7          | 1.4            | 1.11 |
| 10  | Haptoglobin                                                                     | P00738    | HP       | 4.7             | 3.7     | 3.35    | 8.1782  | 0.001001    | 0.034202 | HC-B1; HC-B2B3   | x     | x           | x       | 7.9        | 1            | 1              | 1.16 |
| 11  | Haptoglobin-related protein                                                     | P00739    | HPR      | 2.3             | 1.86    | 2       | 8.0596  | 0.00109     | 0.034569 | B2B3-B1; HC-B2B3 | x     | x           | x       | 2.2        | 0.8          | 1.3            | 1.10 |
| 12  | High mobility group nucleosome-binding domain-containing protein 5              | P82570    | HMGNS    | 0.53            | 0.8     | 0.72    | 8.9428  | 0.000581    | 0.029702 | HC-B1; HC-B2B3   | x     | x           | x       | 0.9        | 0.7          | 1.5            | 1.03 |
| 13  | Immunoglobulin kappa constant                                                   | P01834    | IGKC     | 0.69            | 0.6     | 0.58    | 8.841   | 0.000624    | 0.029702 | HC-B1; HC-B2B3   | x     | x           | x       | 1.3        | 0.7          | 1.3            | 1.04 |
| 14  | Leucine-rich alpha-2-glycoprotein                                               | P02750    | LRG1     | 1.36            | 1.06    | 0.94    | 14.017  | 2.17E-05    | 0.016524 | B2B3-B1; HC-B2B3 | x     | x           | x       | 1.5        | 0.6          | 1.6            | 1.07 |
| 15  | Lumican                                                                         | P51884    | LUM      | 1.42            | 1.59    | 1.42    | 8       | 0.001138    | 0.034648 | HC-B1; HC-B2B3   | x     | x           | x       | 0.7        | 1.8          | 0.5            | 0.93 |
| 16  | Lysine-specific demethylase 3A                                                  | Q8Y4C1    | KDM3A    | 1.57            | 1.71    | 1.54    | 7.588   | 0.001537    | 0.041781 | B2B3-B1; HC-B2B3 | x     | x           | x       | 0.7        | 2.2          | 0.4            | 0.92 |
| 17  | Microtubule-associated protein 1A                                               | P78559    | MAP1A    | 1.43            | 1.12    | 1       | 8.2365  | 0.00096     | 0.034202 | B2B3-B1; HC-B2B3 | x     | x           | x       | 1.4        | 1            | 1              | 1.05 |
| 18  | Phosphatidylinositol 4, 5-bisphosphate 3-kinase catalytic subunit gamma isoform | P48736    | PIK3CG   | 1.9             | 2.19    | 2.07    | 8.5577  | 0.000763    | 0.031999 | B2B3-B1; HC-B2B3 | x     | x           | x       | 0.6        | 3.6          | 0.3            | 0.87 |
| 19  | Phosphatidylinositol 5-phosphate 4-kinase type-2 alpha                          | P48426    | PIP4K2A  | 0.49            | 0.62    | 0.58    | 7.945   | 0.001185    | 0.034672 | HC-B2B3          | x     | x           | x       | 1.1        | 0.8          | 1.3            | 1.03 |
| 20  | Plasma serine protease inhibitor                                                | P05154    | SERPINA5 | 1.79            | 1.72    | 1.56    | 9.1968  | 0.000487    | 0.029702 | B2B3-B1; HC-B2B3 | x     | x           | x       | 0.7        | 2.1          | 0.5            | 0.90 |
| 21  | Plexin-A2                                                                       | O75051    | PLXNA2   | 1.97            | 2.28    | 2.1     | 10.219  | 0.000242    | 0.029028 | B2B3-B1; HC-B2B3 | x     | x           | x       | 0.7        | 3            | 0.3            | 0.86 |
| 22  | PTB domain-containing engulfment adapter protein 1                              | Q9UBP9    | GULP1    | 0.75            | 0.65    | 0.6     | 9.3935  | 0.000425    | 0.029702 | B2B3-B1; HC-B2B3 | x     | x           | x       | 1.2        | 0.8          | 1.3            | 1.04 |
| 23  | Putative inactive neutral ceramidase B                                          | POC7U1    | ASAH2B   | 1.09            | 0.93    | 0.85    | 9.8761  | 0.000305    | 0.029028 | HC-B2B3          | x     | x           | x       | 1.4        | 0.7          | 1.4            | 1.06 |
| 24  | Serine/threonine-protein kinase OSR1                                            | O95747    | OSR1     | 2.15            | 1.67    | 1.48    | 10.728  | 0.000172    | 0.026227 | HC-B2B3          | x     | x           | x       | 1.7        | 1.1          | 0.9            | 1.07 |
| 25  | Serum amyloid A-1 protein                                                       | P0DIJ8    | SAA1     | 1.3             | 1.79    | 1.75    | 7.8854  | 0.000605    | 0.029702 | B2B3-B1; HC-B2B3 | x     | x           | x       | 2.6        | 0.6          | 1.6            | 1.11 |
| 26  | Tetratricopeptide repeat protein 9A                                             | Q92623    | TTG9     | 1.9             | 2.57    | 2.45    | 8.4334  | 0.000834    | 0.031999 | HC-B1; HC-B2B3   | x     | x           | x       | 0.6        | 4.1          | 0.2            | 0.86 |
| 27  | Transgelin-2                                                                    | P37802    | TAGLN2   | 1.73            | 1.37    | 1.23    | 8.9027  | 0.000598    | 0.029702 | HC-B1; HC-B2B3   | x     | x           | x       | 1.4        | 0.9          | 1.1            | 1.08 |
| 28  | Transcriptionally-controlled tumor protein                                      | P13693    | TPT1     | 1.64            | 1.24    | 1.12    | 11.822  | 8.45E-05    | 0.026227 | HC-B1; HC-B2B3   | x     | x           | x       | 1.5        | 0.7          | 1.4            | 1.08 |
| 29  | WD repeat-containing protein 31                                                 | Q8NA23    | WDR31    | 6.73            | 5.05    | 4.6     | 9.9393  | 0.000292    | 0.029028 | B2B3-B1; HC-B2B3 | x     | x           | x       | 4.7        | 0.4          | 2.7            | 1.50 |
